# Supplementary material for: Immobilized palladium nanoparticles within polymers as active catalysts for Suzuki–Miyaura reaction
Source: Royal Society of Chemistry journal article supplement (doi:10.1039/c5ra25925h), 2016-01-01

## **Immobilized Palladium Nanoparticles within polymers as active catalysts for Suzuki-Miyaura reaction**

Ting Chen, Fei Mao, Zhengliang Qi, Yan Li, Rizhi Chen, Yong Wang and Jun Huang<sup>a</sup>

State Key Laboratory of Materials-Oriented Chemical Engineering,  
College of Chemical Engineering, Nanjing Tech University, Nanjing  
210009 (P. R. China)

E-mail: [junhuang@njtech.edu.cn](mailto:junhuang@njtech.edu.cn)

### **General Methods and Reagents**

All reagents were purchased from Aladdin Reagent Company, Sigma-Aldrich Company and Alfa-Aesar Company without further purification. <sup>1</sup>H-NMR spectra were measured with a Bruker AVANCE 400D spectrometer in CDCl<sub>3</sub> using tetramethylsilane (TMS) as internal reference. TEM images were obtained using a JEOL JEM-2010 (200 kV) TEM instrument and SEM images were performed on a HITACHI S-4800 field-emission scanning electron microscope. Thermogravimetry (TG) analysis was carried out with a STA409 instrument under dry air at a heating rate of 10 °C/min. X-ray diffraction (XRD) patterns were collected on the Bruker D8 Advance powder diffractometer using Ni-filtered Cu K $\alpha$  radiation source at 40 kV and 20 mA, from 5° to 80° with a scan rate of 0.5° / min. The BET surface areas were measured at -77 °C with liquid nitrogen using a Micromeritics ASAP2010 analyzer. The samples were degassed at 150 °C under vacuum of 10<sup>-3</sup> Torr before analysis. Fourier transform infrared (FT-IR) spectra were recorded on a Nicolet 360 FT-IR instrument (KBr discs) in the 4000-400 cm<sup>-1</sup> region. The amount of Pd was measured using a Jarrell-Ash 1100 ICP-AES spectrometer (Inductively Coupled Plasma-Atomic Emission Spectrometry).

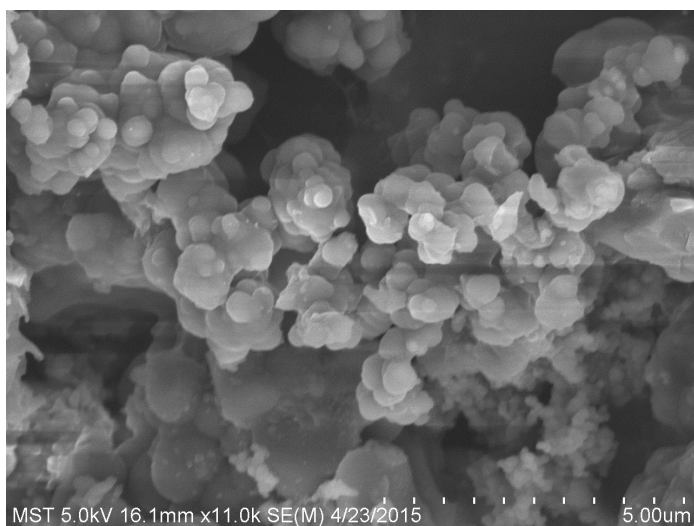

**Fig. S1** Scanning electron micrograph (SEM) images of Pd@PNP catalyst

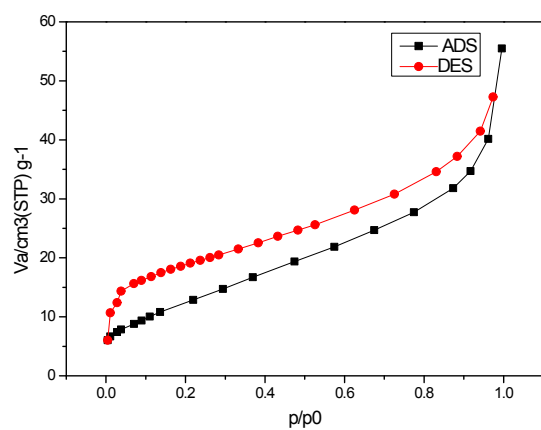

**Fig. S2** Nitrogen adsorption-desorption isotherm of the catalyst Pd@PNP

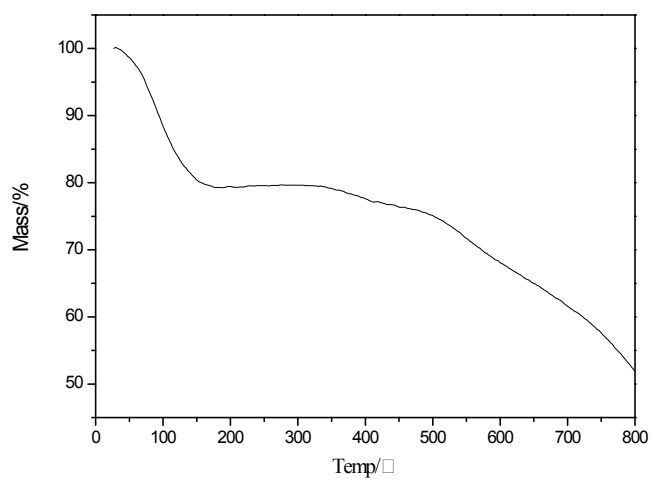

**Fig. S3** TG curve of Pd@PNP catalyst

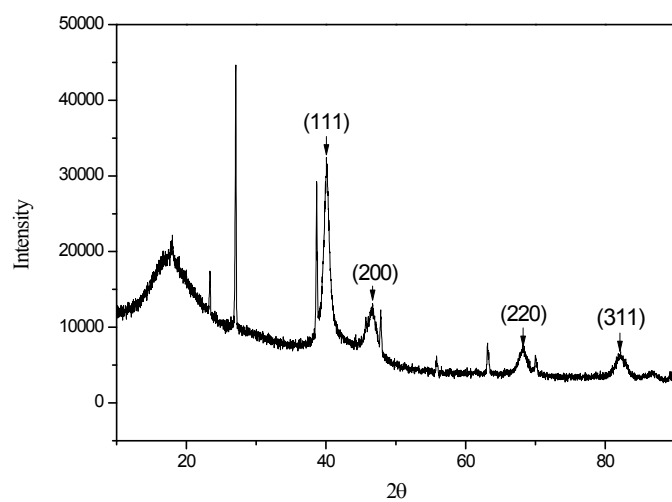

**Fig.S4** XRD of Pd@PNP catalyst

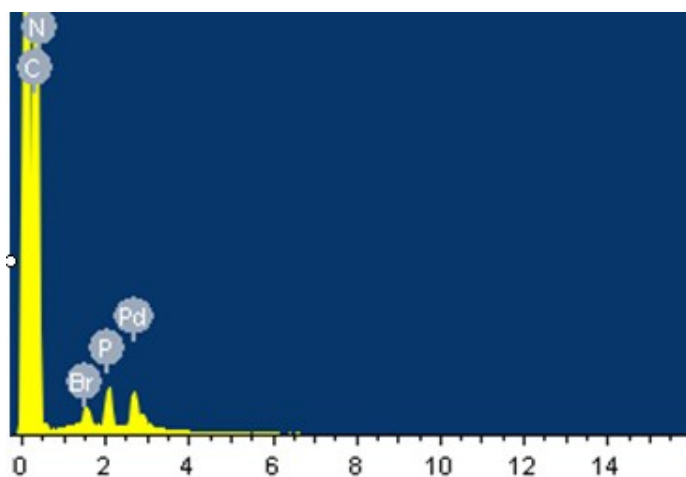

**Fig. S5** EDX elemental analysis of Pd@PNP catalyst

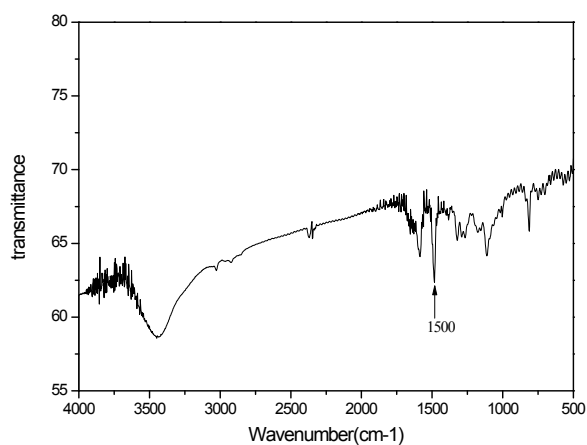

**Fig. S6** The FT-IR spectra of Pd@PNP catalyst

**The product data.**

4-Nitro-biphenyl.  $^1\text{H}$  NMR (500 MHz,  $\text{CDCl}_3$ ):  $\delta$  7.48-7.56 (m, 3H), 7.68 (d,  $J=7.5$  Hz, 2H), 7.79 (d,  $J=9.0$  Hz, 2H), 8.35 (d,  $J=9.0$  Hz, 2H).

2,6-Dimethyl-biphenyl.  $^1\text{H}$  NMR (500 MHz,  $\text{CDCl}_3$ ):  $\delta$  2.14 (s, 6H), 7.21-7.31 (m, 5H), 7.41-7.45 (m, 1H), 7.52 (t,  $J=7.5$  Hz, 2H).

4-Acetylbiphenyl.  $^1\text{H}$  NMR (500 MHz,  $\text{CDCl}_3$ ):  $\delta$  2.69 (s, 3H), 7.45 (t,  $J = 7.0$  Hz, 1H), 7.52 (t,  $J = 7.5$  Hz, 2H), 7.68 (d,  $J = 7.5$  Hz, 2H), 7.74 (d,  $J = 8.5$  Hz, 2H), 8.08 (d,  $J = 8.0$  Hz, 2H).

4-Phenylbenzaldehyde.  $^1\text{H}$  NMR (500 MHz,  $\text{CDCl}_3$ ):  $\delta$  7.45-7.55 (m, 3H), 7.69 (d,  $J=7.0$  Hz, 2H), 7.81 (d,  $J=8.0$  Hz, 2H), 8.00 (d,  $J=8.0$  Hz, 2H), 10.11 (s, 1H).

4-Methyl-biphenyl.  $^1\text{H}$  NMR (500 MHz,  $\text{CDCl}_3$ ):  $\delta$  2.45 (s, 3H), 7.31 (t,  $J = 4.5$  Hz, 2H), 7.38 (t,  $J = 7.5$  Hz, 1H), 7.48 (t,  $J = 8.0$  Hz, 2H). 7.55 (d,  $J = 8.0$  Hz, 2H). 7.62-7.64 (m, 2H).

4-Phenylbenzotrile.  $^1\text{H}$  NMR (500 MHz,  $\text{CDCl}_3$ ):  $\delta$  7.46-7.55 (m, 3H), 7.64 (d,  $J = 7.5$  Hz, 2H), 7.73-7.79 (m, 4H).

4-Tert-butylbiphenyl.  $^1\text{H}$  NMR (500 MHz,  $\text{CDCl}_3$ ):  $\delta$  1.44 (s, 9H), 7.39 (t,  $J = 7.0$  Hz, 1H), 7.48-7.55 (m, 4H), 7.61 (d,  $J=8.4$  Hz, 2H), 7.66 (d,  $J=7.5$  Hz, 2H).

4-Methoxy-biphenyl.  $^1\text{H}$  NMR (500 MHz,  $\text{CDCl}_3$ ):  $\delta$  3.90 (s, 3H), 7.03 (d,  $J = 9.0$  Hz, 2H), 7.35 (t,  $J = 7.0$  Hz, 1H), 7.46 (t,  $J = 7.5$  Hz, 2H), 7.57-7.61 (m, 4H).

2-Methoxy-biphenyl.  $^1\text{H}$  NMR (500 MHz,  $\text{CDCl}_3$ ):  $\delta$  3.90 (s, 3H), 7.07-7.15 (m, 2H), 7.42 (t,  $J=7.5$  Hz, 3H), 7.51 (t,  $J=7.5$  Hz, 2H), 7.63-7.65 (m, 2H).

2-Nitro-biphenyl.  $^1\text{H}$  NMR (500 MHz,  $\text{CDCl}_3$ ):  $\delta$  7.36-7.40 (m, 2H), 7.44-7.55 (m, 5H), 7.65-7.68 (m, 1H), 7.89-7.91 (m, 1H).

Biphenyl-2-carbonitrile.  $^1\text{H}$  NMR (500 MHz,  $\text{CDCl}_3$ ):  $\delta$  7.48-7.62 (m, 7H), 7.70(t,  $J = 7.5$  Hz, 1H), 7.82 (d,  $J = 7.5$  Hz, 1H).

2-Methyl-biphenyl.  $^1\text{H}$  NMR (500 MHz,  $\text{CDCl}_3$ ):  $\delta$  2.38 (s, 3H), 7.31-7.36 (m, 4H), 7.43 (t,  $J = 9.0$  Hz, 3H), 7.49-7.55 (m, 2H).

# 4-Nitro-biphenyl

ct  
CT-1 1H-NMR CDCl3 300K WNMN-500

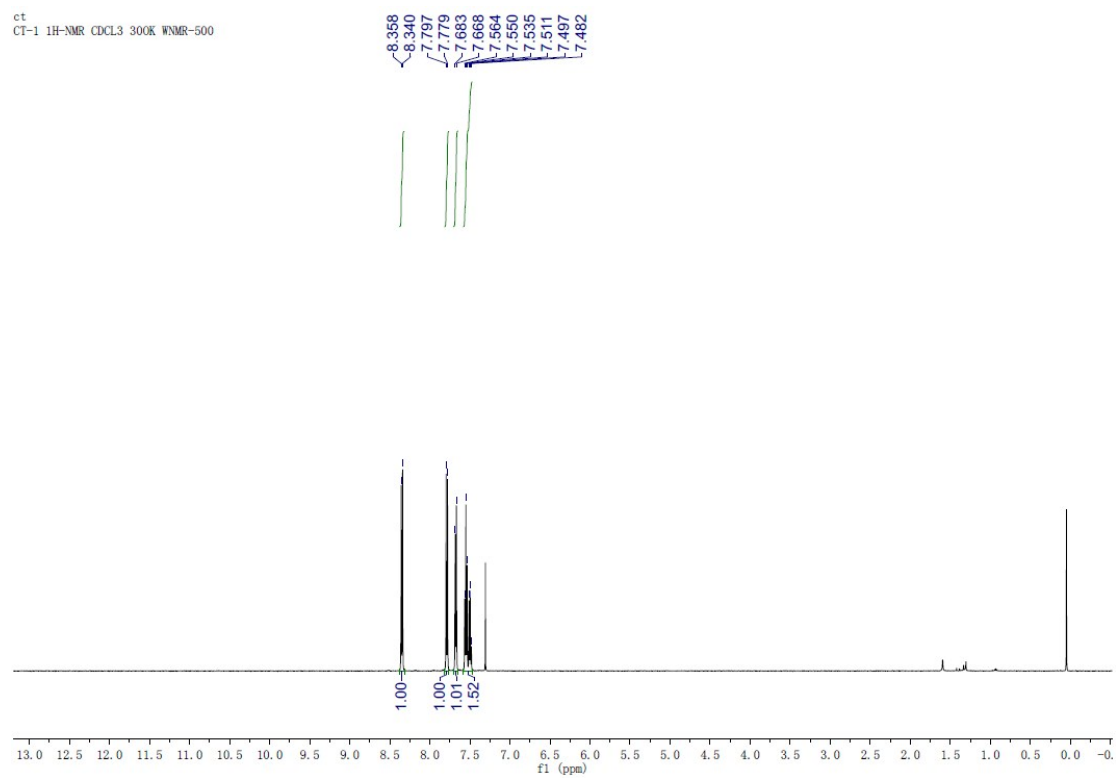

# 2,6-Dimethyl-biphenyl

ct  
CT-2 1H-NMR CDCl3 300K WNMN-500

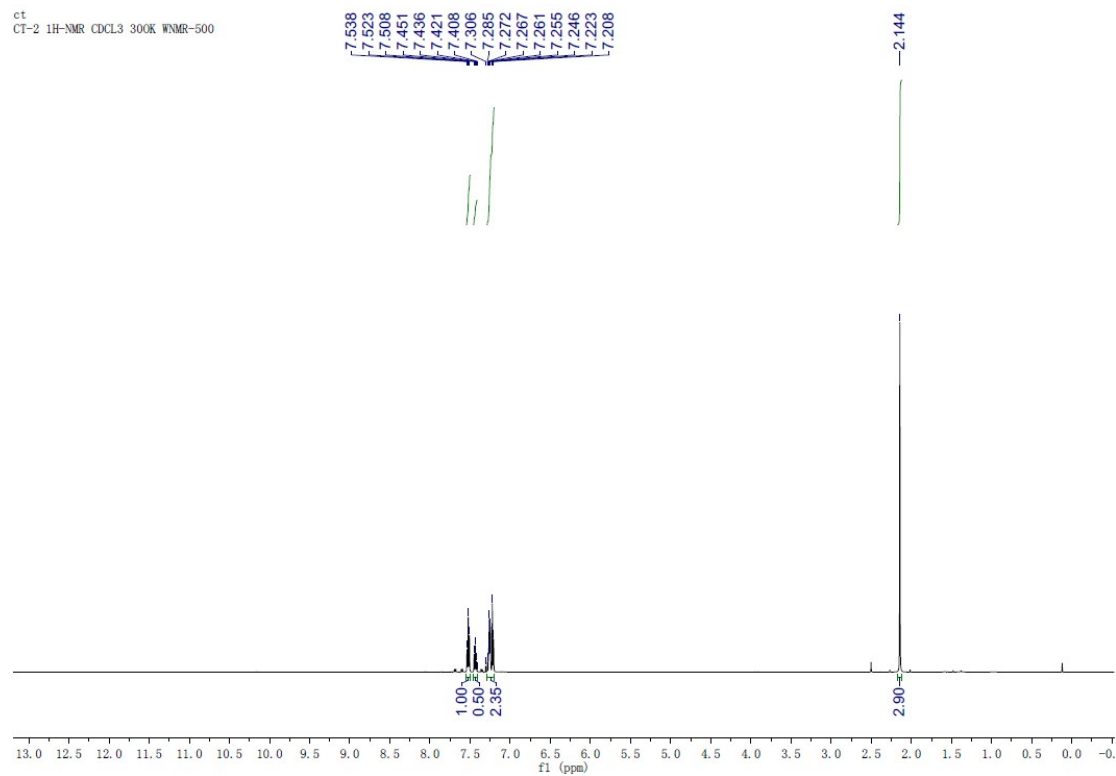

# 4-Acetylbiphenyl

ct  
CT-3 1H-NMR CDCL3 300K WNM-500

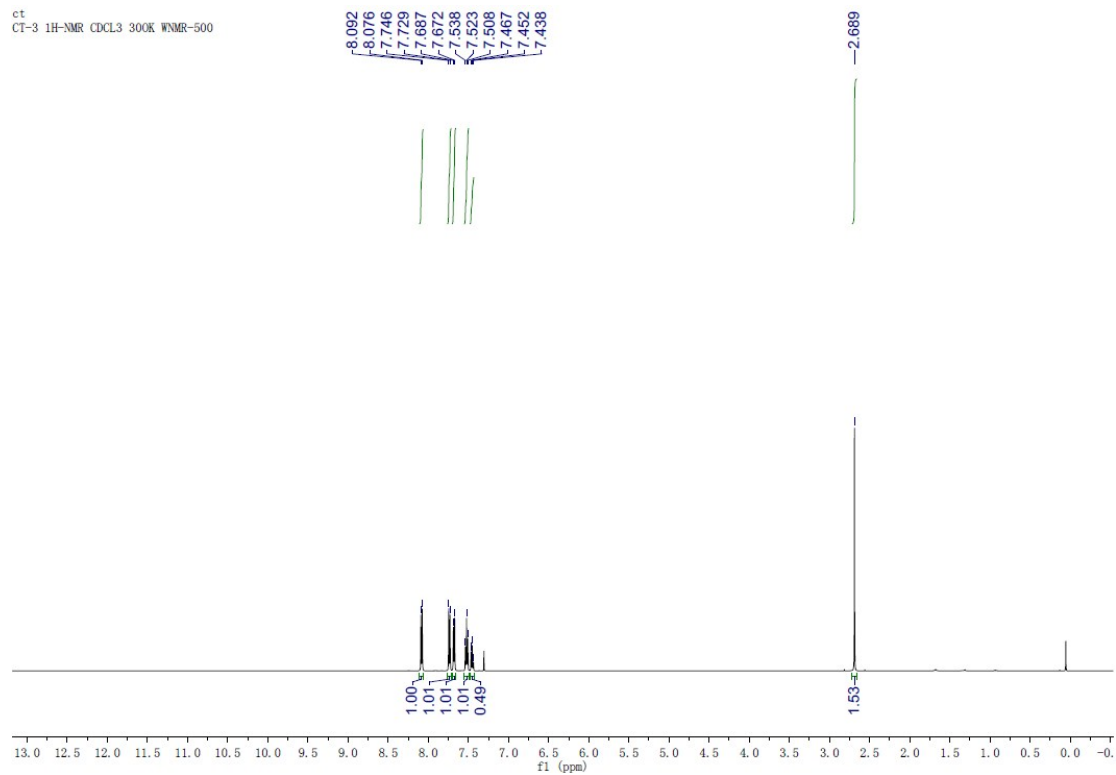

# 4-Phenylbenzaldehyde

ct  
CT-4 1H-NMR CDCL3 300K WNM-500

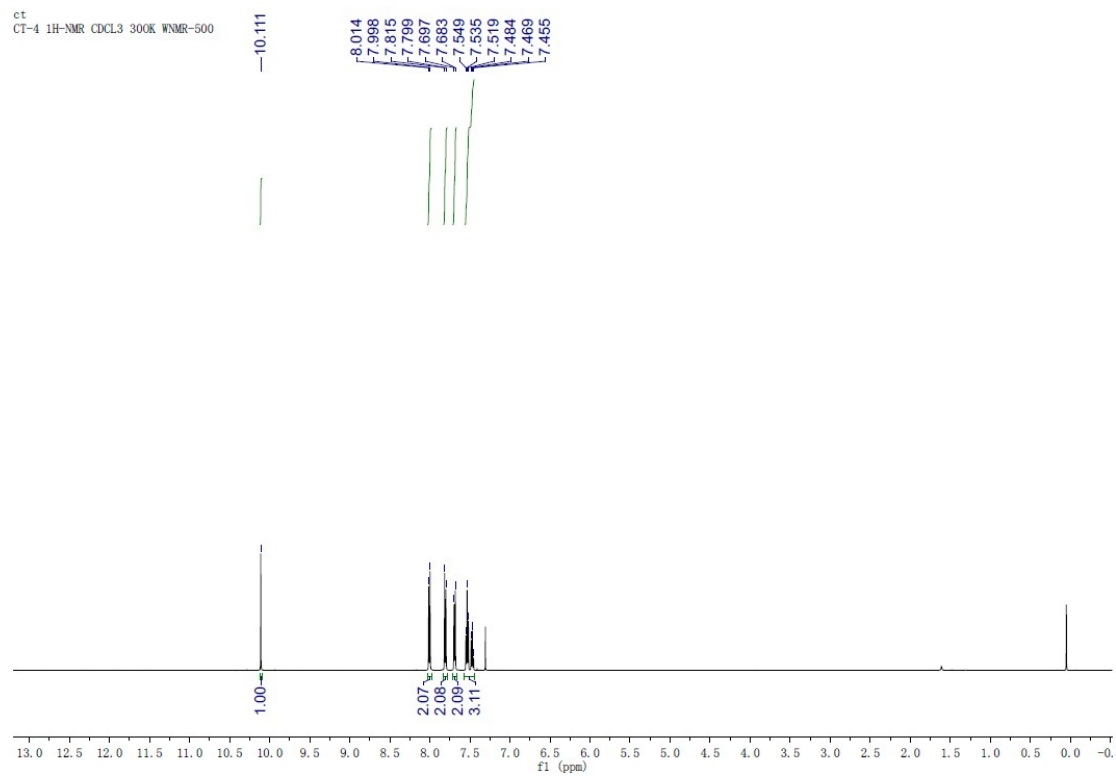

# 4-Methyl-biphenyl

ct  
CT-5 1H-NMR CDCL3 300K WNM-500

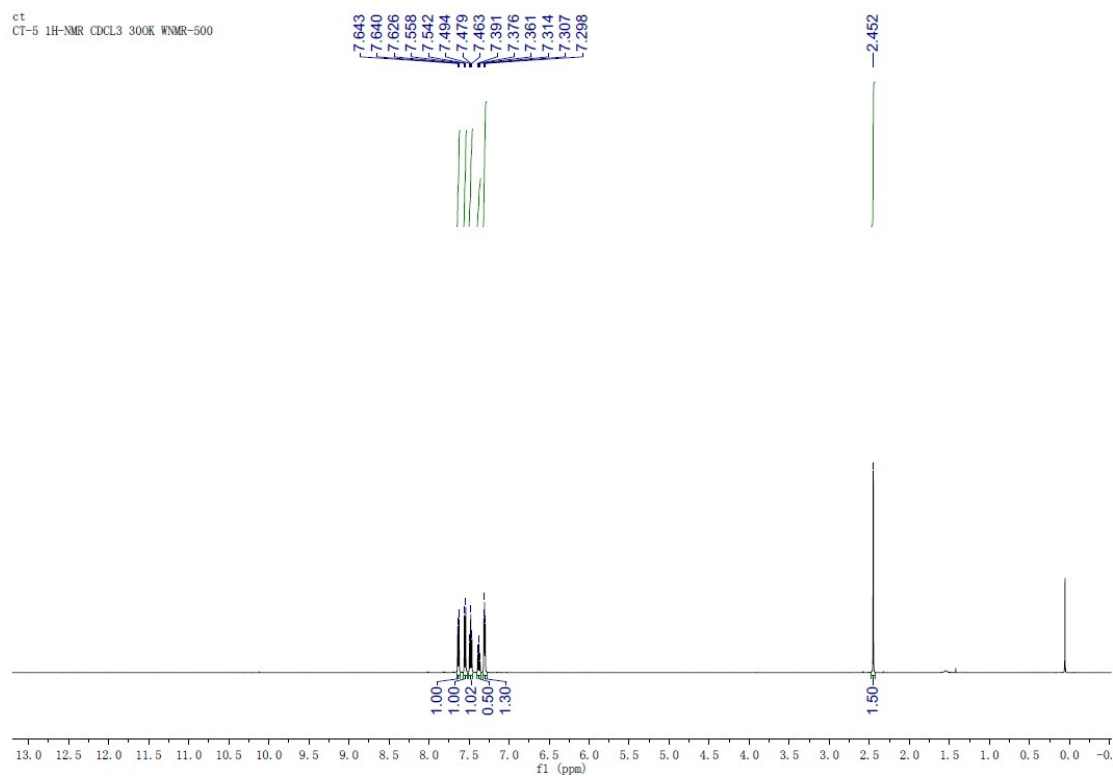

# 4-Phenylbenzotrile

ct  
CT-6 1H-NMR CDCL3 300K WNM-500

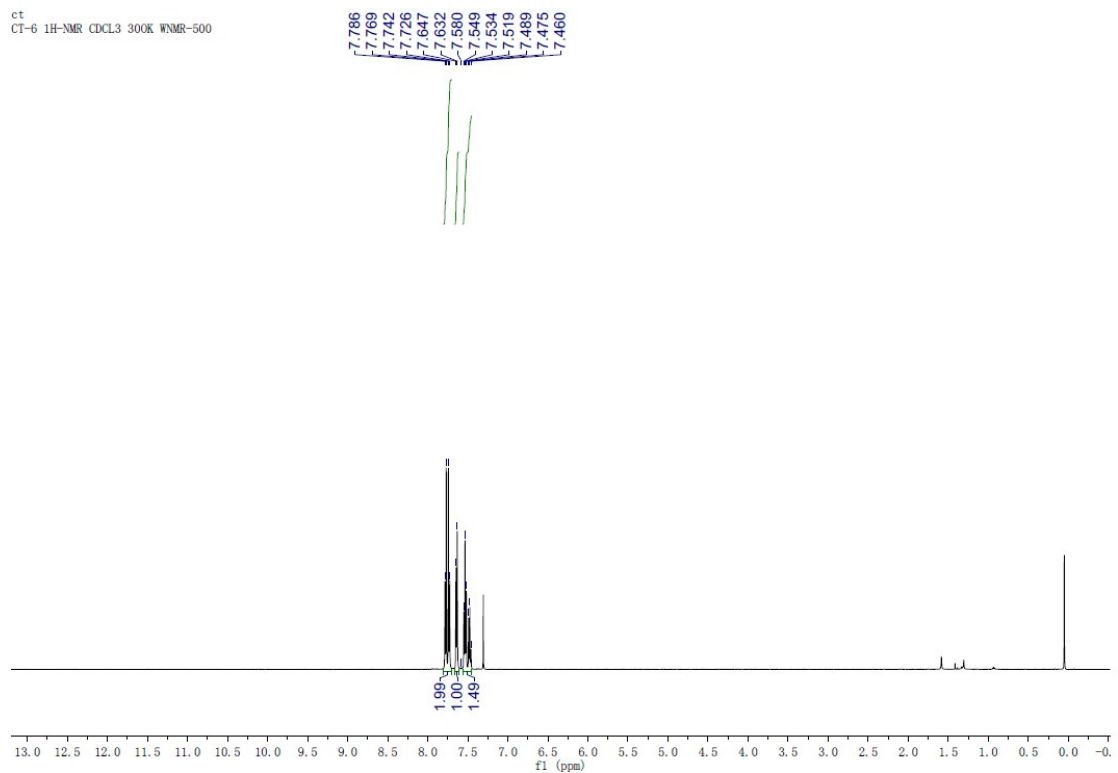



# 4-Tert-butylbiphenyl

ct  
CT-7 1H-NMR CDCL3 300K WNM-500

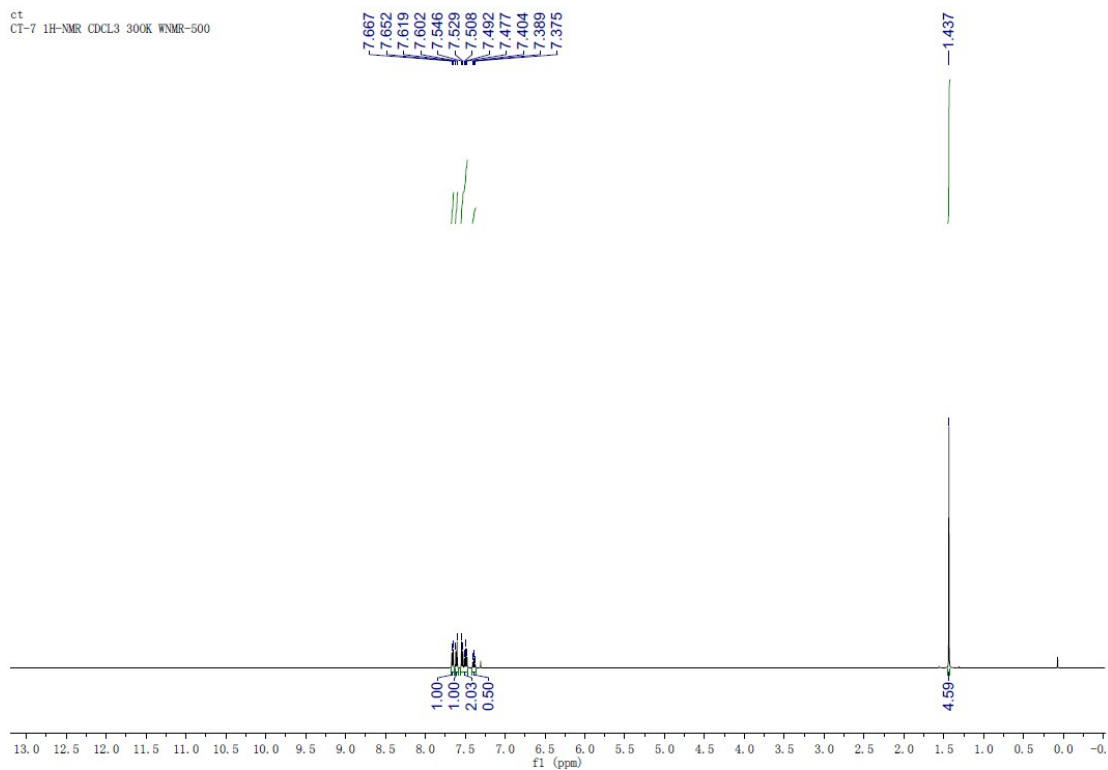

# 4-Methoxy-biphenyl

ct  
CT-8 1H-NMR CDCL3 300K WNM-500

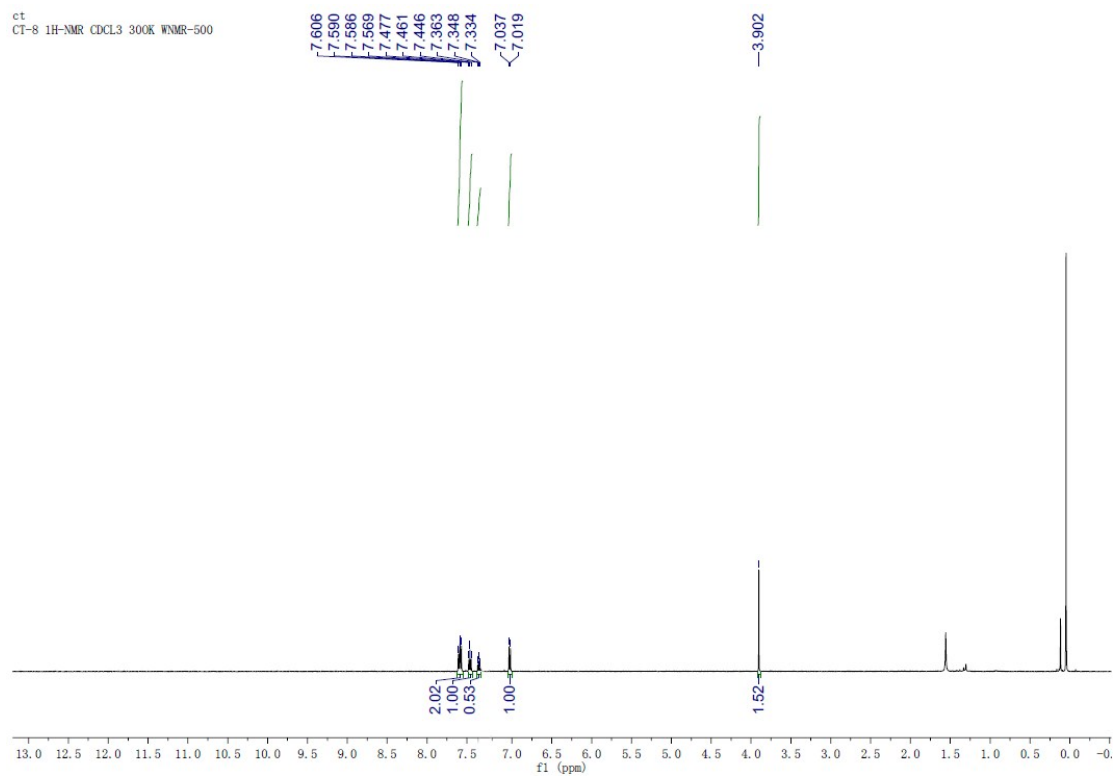

## 2-Methoxy-biphenyl

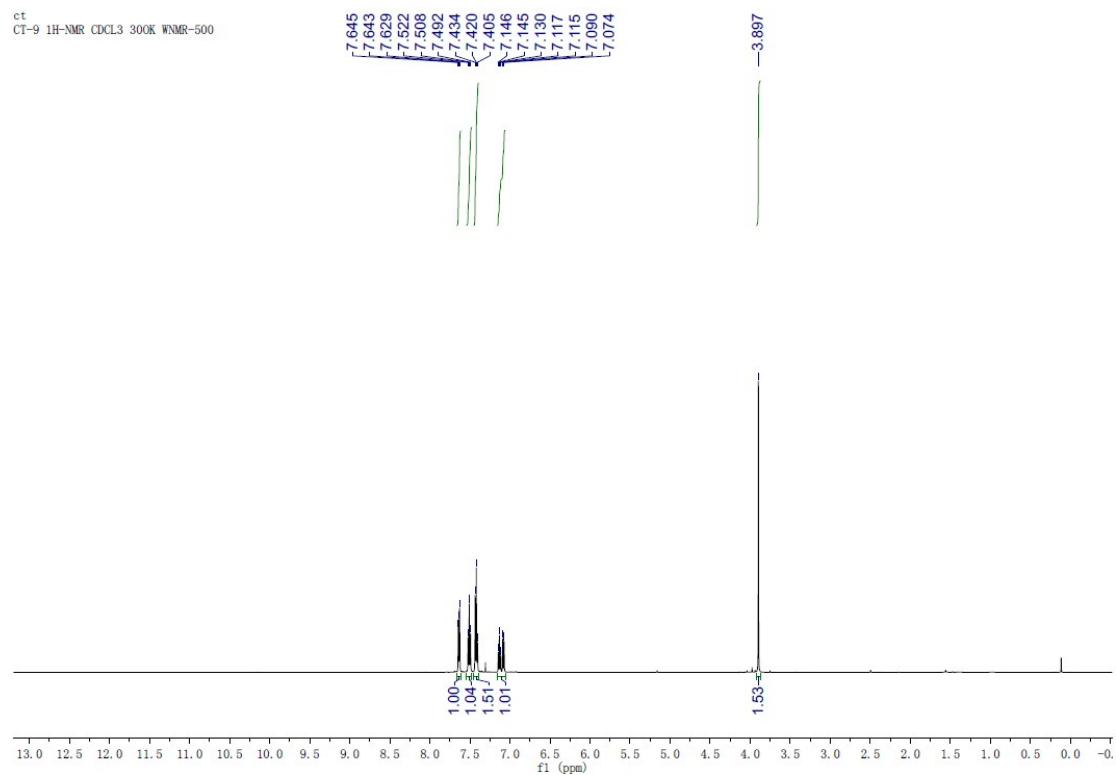

## 2-Nitro-biphenyl

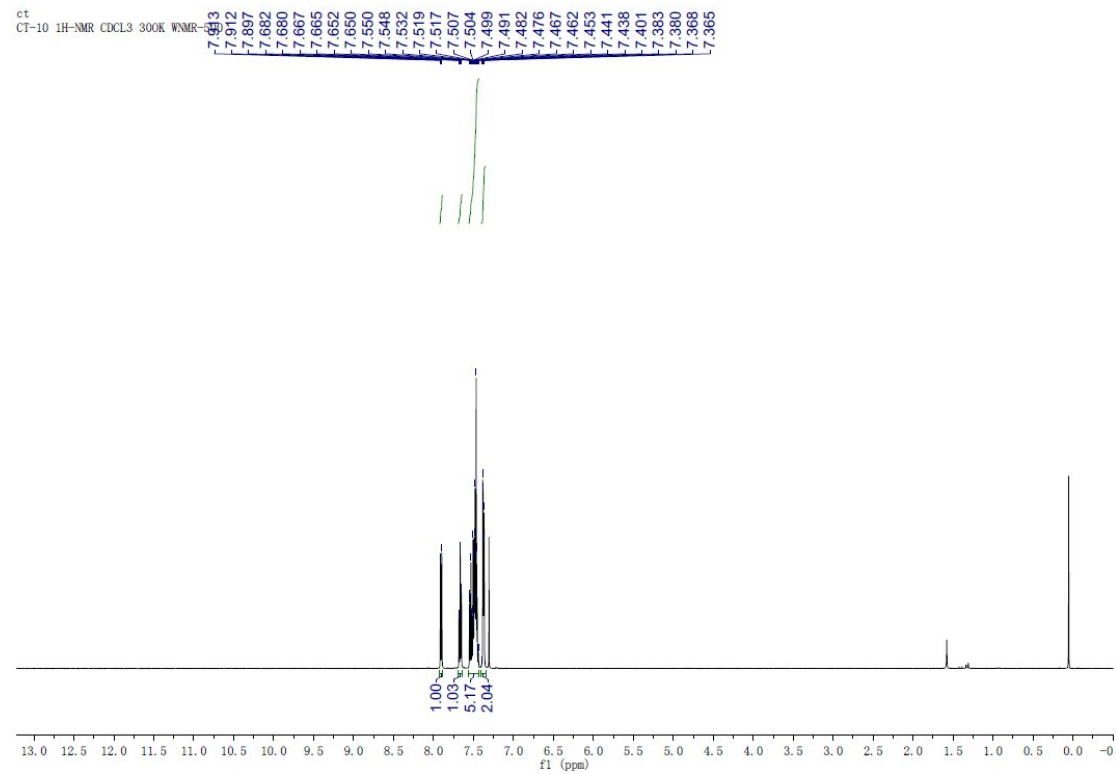

# Biphenyl-2-carbonitrile

ct  
CT-11 1H-NMR CDCL3 300K WNM-500

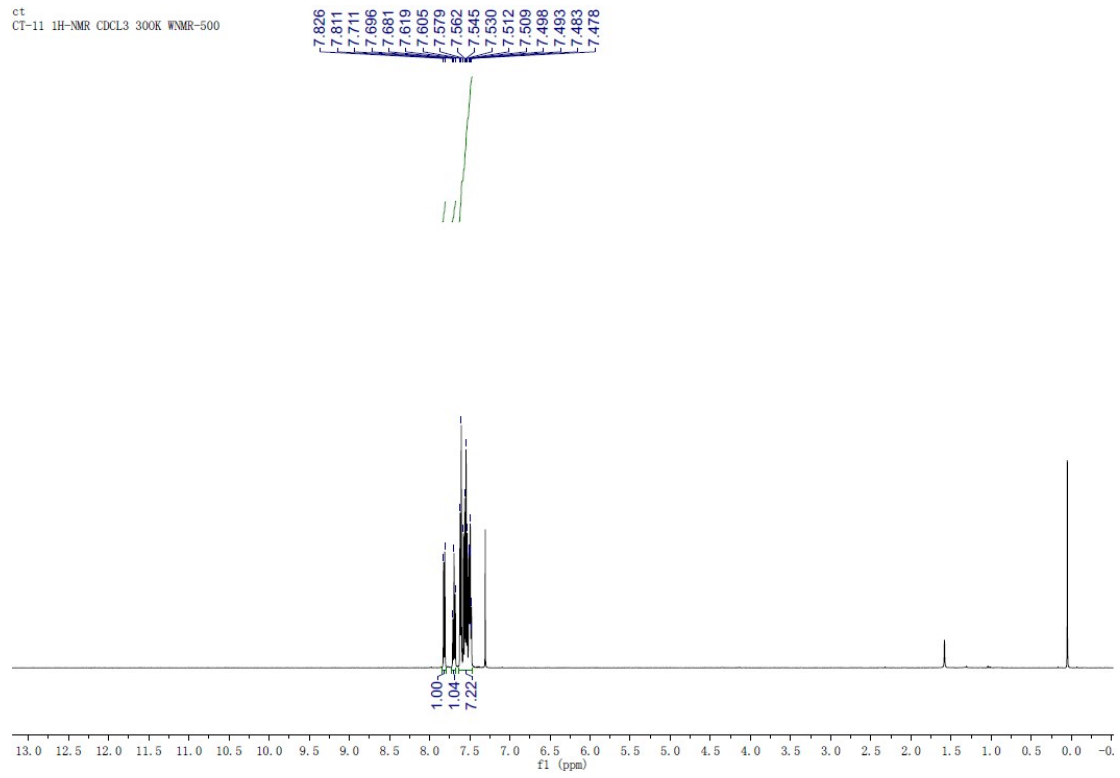

# 2-Methyl-biphenyl

ct  
CT-12 1H-NMR CDCL3 300K WNM-500

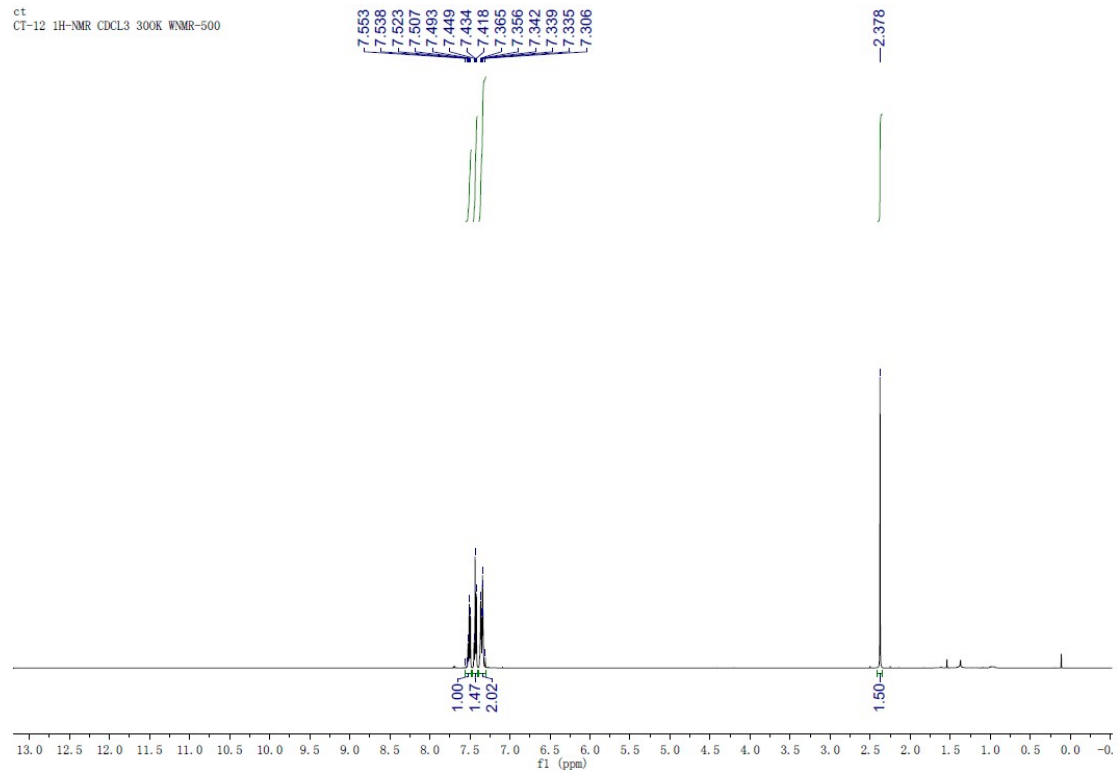

Supplement: c5ra25925h1.pdf [file c5ra25925h1.pdf]
